# Supplementary material for: mRNA vaccination in people over 80 years of age induces strong humoral immune responses against SARS-CoV-2 with cross neutralization of P.1 Brazilian variant
Source: eLife. 2021 Sep 29;10:e69375. doi: 10.7554/eLife.69375 (PMC8500710; doi:10.7554/eLife.69375)
Supplement: Figure 1—source data 1. [file elife-69375-fig1-data1.xlsx]

## Sheet: Sheet1
1A			1B			1C			1D			1E
ID	Roche		N	S		DBS ratio	Roche S 1:1000		DBS post first	DBS post second		DBS post first	DBS post second
98	184000		69.4	9330		5.17	9330					5.12	5.17
7	88600		20.4	27900		5.06	2020		2.64	5.06		5.14	5.14
14	75900		63.7	88600		5.14	27900		4.47	4.19		5.22	5.04
75	39400		15	27600		2.3	1703					5.07	5.26
51	36600		20.7	75900		2.27	364		1.35	2.3		5.76	5.95
4	27900		189	36600		5.04	88600		1.32	2.27		5.08	4.61
8	27600		25.1	39400		5.26	27600					6.21	6.26
66	25200		178	184000		2.85	1293					5.31	5.79
99	19000		59.7	19000		4.75	5340			2.85		3.29	4.73
125	18500		3.29	18500		3.61	422		1.48	4.75		5.14	5.91
28	10300					3.31	416		0.53	3.61
1	9330					4.61	75900		0.4	3.31
61	5780					0.71	47.5		0.59	0.71
10	5340					3.86	1940		2.56	3.86
52	4860					2.27	822			2.27
77	4520					1.49	326			1.49
41	4230					3.81	1530		2.15	3.81
57	4180						1377		1.52
100	4000					4.58	883		0.98	4.58
55	3560					4.9	891		2.02	4.9
25	3510						679
109	3370					4.79	3510		2.17	4.79
69	2600					2.72	225		0.81	2.72
104	2476					5.15	10300		1.28	5.15
44	2290					4.21	787		2.5	4.21
71	2251						76.2		3.89
121	2152					4.82	2112		0.66	4.82
62	2119					3.93	1064		0.81	3.93
31	2112					2.53	53.6		3.05	2.53
102	2070					4.76	1985		1.28	4.76
2	2020					3.66	1539		1.84	3.66
36	1985					2.78	326		1.33	2.78
90	1945					3.77	1360		0.76	3.77
16	1940					0.5	1		0.42	0.5
85	1931					4.99	4230		1.33	4.99
46	1828					3.84	1073		1.04	3.84
108	1746					3.37	2290		1.73	3.37
49	1720					3.07	462		0.8	3.07
5	1703					4.29	1828		2.61	4.29
73	1654					3.73			0.83	3.73
72	1640					3.73	261		0.99	3.73
82	1629					5.55	1720		1.77	5.55
63	1578					5.95	36600
37	1539					5.64	4860		1.22	5.64
19	1530					4.37	828		0.81	4.37
105	1413					5.95	3560		2.79	5.95
20	1377					4.79	4180		5.19	4.79
39	1360					4.73	988		1.2	4.73
97	1349					4.64	1080		1.36	4.64
68	1298					4.28	162		0.84	4.28
9	1293					1.75	5780		5.53	1.75
123	1231					4.8	2119		1.42	4.8
70	1195					3.62	1578		1.38	3.62
59	1080					3.11	61.5		0.75	3.11
42	1073					0.95	2.48			2.56
32	1064					5.19	25200		5.47	6.31
58	988					1.4	58.4		1.41	4.78
122	973					5.25	1298
103	917					5.1	2600		1.52	5.19
22	891					4.83	1195		0.59	1.4
21	883					2.56	2251		1.37	5.25
110	875					6.31	1640		1.95	5.1
80	841					3.7	1654		1.36	4.83
54	828					2.93	224		0.85	3.7
17	822					6.26	39400		0.41	2.93
29	787					1.77	186
89	748					4.4	4520		0.59	1.77
24	679					3.41	841		1.1	4.4
111	583					1.75	349			1.75
87	527					4.78	1629		4.19	4.11
106	481					2.57	298		0.27	2.57
45	462					3.95	1931		0.56	3.74
113	448					4.11	527		0.71	4.28
11	422					2.57	67.5		0.63	0.86
12	416					3.74	748		0.48	2.8
6	364					4.28	1945			1
81	349					0.86	37.2		0.54	3.41
18	326					2.8			0.95	2.57
38	326					3.59	1349		1.26	3.95
84	298					5.79	184000		0.8	3.59
48	261					4.73	19000
26	225					3.57	4000
74	224						2070		0.64	3.57
76	186					3.77	917
124	180					2.97	2476		1.47	3.77
107	170					3.86	1413			2.97
60	162					4.91	481		1.8	3.86
30	76.2					2.46	170		0.64	4.91
88	67.5					3.97	1746		0.6	2.46
64	61.5					3.41	3370		1.05	3.97
67	58.4					3.98	875		0.93	3.41
35	53.6					4.33	583			3.98
15	47.5					1	448			4.33
92	37.2					21.76	2152		1.19	21.76
65	2.48					4.66	973		1.42	4.66
40	1					3.19	1231		0.93	3.19
92	37.2					2.54	180		0.41	2.54
65	2.48					5.91	18500
40	1									0.95
									1.44
