# Supplementary material for: mRNA vaccination in people over 80 years of age induces strong humoral immune responses against SARS-CoV-2 with cross neutralization of P.1 Brazilian variant
Source: eLife. 2021 Sep 29;10:e69375. doi: 10.7554/eLife.69375 (PMC8500710; doi:10.7554/eLife.69375)
Supplement: Figure 2—source data 1. [file elife-69375-fig2-data1.xlsx]

## Sheet: Sheet1
	2A			2B		2C			2D			2E			2F
	S1	S2		Spike		PE	NPE		PE	NPE		PE	NPE		Roche S 1:1000	ELISpot Spike 1 +Spike 2	Serostatus
	856	176		1040		1040	72		12	4		76	4		9330	1040	Positive
	40	32		72		188	44		24	0		48	0		2020	72	Negative
	204	240		704		388	16		44	0		24	0		27900	188	Positive
	72	96		188		228	12		0	0		12	0		1703	44	Negative
	16	20		44			172			0			0		364	16	Negative
	4	8		16		340	20		24	0		28	4		88600	388	Positive
	152	140		388		208	272		0	0		20	0		27600	228	Positive
	72	136		228		960	4		16	0		40	0		1293	12	Negative
	8	0		12		56	436		4	4		32	0		5340	172	Negative
	104	16		172		100	80		0	4		12	0		422	20	Negative
	76	28		20			0			4			4		416	272	Negative
	264	200		272			380			0			0		75900		Positive
	12	8		4			12			4			0		47.5	4	Negative
	284	116		436			24			0			0		1940	436	Negative
	16	12		80			16			4			4		822	80	Negative
	8	16					24			0			0		326	0	Negative
	124	160		380			12			0			0		1530	380	Negative
	16	12		12			160			12			4		1377	12	Negative
	20	16		24			172			0			0		883	24	Negative
	20	0		16			52			0			0		891	16	Negative
	16	4		24			296			4			8		679	24	Negative
	16	16		12			36			8			8		3510	12	Negative
	20	72		160			424			4			4		225	160	Negative
	64	36		172			12			16			8		10300	172	Negative
	52	28		52			168			20			0		787	52	Negative
	28	36		296			176			8			4		76.2	296	Negative
	52	32		36			8			4			8		2112	36	Negative
	220	56		424			108			0			0		1064	424	Negative
	0	12		12			12			0			8		53.6	12	Negative
	84	152		168			136			4			4		1985	168	Negative
	100	80		176			136			12			4		1539	176	Negative
	4	4		8			316			0			0		326	8	Negative
	20	28		108			376			4			0		1360	108	Negative
	0	8		12			48			0			8		1	12	Negative
	120	20		136			24			8			12		4230	136	Negative
	28	32		136			108			0			8		1073	136	Negative
	800	304		316			204			0			0		2290	316	Negative
	288	156		376			452			16			8		462	376	Negative
	20	12		48			16			12			4		1828	48	Negative
	72	48		24			72			0			4			24	Negative
	80	100		108			80			64			68		261	108	Negative
	40	36		204			24			12			4		1720	204	Negative
	252	44		340			36			4			4		36600	340	Positive
	704	376		452			220			0			0		4860	452	Negative
	148	40		16			64			4			0		828	16	Negative
	64	16		72			16			0			4		3560	72	Negative
	296	76		80			136			0			0		4180	80	Negative
	40	36		24			16			12			0		988	24	Negative
	20	68		36			8			4			16		1080	36	Negative
	16	80		220			72			0			0		162	220	Negative
	0	4		64			20			0			8		5780	64	Negative
	16	32		16			40			12			0		2119	16	Negative
	32	20		136			256			0			0		1578	136	Negative
	24	8		16			108			0			0		61.5	16	Negative
	156	124		256			256			0			4		2.48	8	Negative
	76	16		52			52			16			4		25200	72	Negative
	48	68		88			28			0			0		58.4	20	Negative
	0	0					84			8			4		1298	40	Negative
	28	52		72			80			4			0		2600	256	Negative
	4	4		20			644			12			8		1195	108	Negative
	0	24		40			232			0			0		2251	256	Negative
	132	72		256			8			0			0		1640	52	Negative
	12	16		108			88			4			4		1654	28	Negative
	8	20		28			12			0			0		224	84	Negative
	16	8		84			140			0			12		39400	208	Positive
	76	120		208			140			4			4		186	80	Negative
	48	4		80			12			4			0		4520	644	Negative
	408	264		644			136			8			4		841	232	Negative
	12	4		8			68			0			0		349	8	Negative
	24	20		140			12			0			0		1629	88	Negative
	12	0		12			68			0			4		298	12	Negative
	76	28		136			516			4			8		1931	140	Negative
	40	28		68			1252			8			0		527	140	Negative
	0	0		12			48			0			4		67.5	12	Negative
	24	20		68			24			20			8		748	136	Negative
	8	8		12			1344			4			8		1945	68	Negative
	32	128		232			628			4			0		37.2	12	Negative
	20	8		12			8			8			0			68	Negative
	20	52		140			276			0			4		1349	516	Negative
	112	100		516			8			0			0		184000	960	Positive
	652	364		960			152			0			16		19000	56	Positive
	32	16		56			32			8			0		4000	1252	Negative
	44	1236		1252			116			8			4		2070	48	Negative
	28	16		48			12			0			0		917	24	Negative
	52	20		24			36			0			4		2476	1344	Negative
	1128	488		1344			128			8			4		1413	628	Negative
	144	396		628			428			12			4		481	8	Negative
	20	16		8			100			4			4		170	276	Negative
	68	44		276											1746	8	Negative
	4	12		8											3370	152	Negative
	92	56		152											875	32	Negative
	44	12		32											583	116	Negative
	24	32		116											448	12	Negative
	28	28		36											2152	36	Negative
	32	36		128											973	128	Negative
	52	148		428											1231	428	Negative
	16	36		100											180	100	Negative
	28	16		100											18500	100	Positive
