# Supplementary material for: mRNA vaccination in people over 80 years of age induces strong humoral immune responses against SARS-CoV-2 with cross neutralization of P.1 Brazilian variant
Source: eLife. 2021 Sep 29;10:e69375. doi: 10.7554/eLife.69375 (PMC8500710; doi:10.7554/eLife.69375)
Supplement: Figure 3—source data 1. [file elife-69375-fig3-data1.xlsx]

## Sheet: Sheet1
	3A				3B				3C
	Roche S 1:1000	Age	status		COV-2-Spike	Age	Status		ELISpot Spike 1 +Spike 2	Age	Status
	9330	80	Positive		75763	80+AW3	Positive		1040	80	Positive
	2020	81	Negative		73365.3	81	Negative		72	81	Negative
	27900	83	Positive		74270.9	83	Positive		188	83	Positive
	1703	84	Negative		72275.4	83	Positive		44	84	Negative
	364	84	Negative		70033	84	Negative		16	84	Negative
	88600	81	Positive		35161.7	84	Negative		388	81	Positive
	27600	82	Positive		73364.4	81	Positive		228	82	Positive
	1293	83	Negative		72326.7	82	Positive		12	83	Negative
	5340	81	Negative		70862.9	83	Negative		172	81	Negative
	422	81	Negative		70044.9	81	Negative		20	81	Negative
	416	84	Negative		56141.2	81	Negative		272	84	Negative
	75900	81	Positive		63100.1	84	Negative			81	Positive
	47.5	81	Negative		73692.7	81	Positive		4	81	Negative
	1940	81	Negative		10414.2	81	Negative		436	81	Negative
	822	82	Negative		70895.4	81	Negative		80	82	Negative
	326	81	Negative		66011	82	Negative		0	81	Negative
	1530	81	Negative		55287.8	81	Negative		380	81	Negative
	1377	84	Negative		71315.1	81	Negative		12	84	Negative
	883	89	Negative		67813.8	84	Negative		24	89	Negative
	891	82	Negative		56980	89	Negative		16	82	Negative
	679	87	Negative		66533.9	82	Negative		24	87	Negative
	3510	85	Negative		62811.5	87	Negative		12	85	Negative
	225	86	Negative		72143.9	85	Negative		160	86	Negative
	10300	86	Negative		43515.5	86	Negative		172	86	Negative
	787	81	Negative		71293.4	86	Negative		52	81	Negative
	76.2	81	Negative		62132.3	81	Negative		296	81	Negative
	2112	84	Negative		10017.7	81	Negative		36	84	Negative
	1064	121	Negative		67013.1	84	Negative		424	121	Negative
	53.6	80	Negative		72085.1	121	Negative		12	80	Negative
	1985	81	Negative		19315.5	80	Negative		168	81	Negative
	1539	81	Negative		69715.2	81	Negative		176	81	Negative
	326	85	Negative		67184.3	81	Negative		8	85	Negative
	1360	86	Negative		13432.6	85	Negative		108	86	Negative
	1	87	Negative		68140.8	86	Positive		12	87	Negative
	4230	84	Negative		924.093	87	Negative		136	84	Negative
	1073	83	Negative		70332.6	84	Negative		136	83	Negative
	2290	81	Negative		67697	83	Negative		316	81	Negative
	462	85	Negative		62601.5	81	Positive		376	85	Negative
	1828	82	Negative		46124.3	85	Negative		48	82	Negative
		81	Negative		#VALUE!	82	Eerror		24	81	Negative
	261	90	Negative		48561.8	81	Negative		108	90	Negative
	1720	83	Negative		8581.8	90	Negative		204	83	Negative
	36600	80	Positive		63962.3	83	Negative		340	80	Positive
	4860	80	Negative		65835.8	80	Positive		452	80	Negative
	828	86	Negative		63170.9	80	Negative		16	86	Negative
	3560	89	Negative		61241.2	86	Negative		72	89	Negative
	4180	83	Negative		20566.2	89	Negative		80	83	Negative
	988	80	Negative		61898.6	83	Negative		24	80	Negative
	1080	85	Negative		50842.9	80	Negative		36	85	Negative
	162	88	Negative		47864.4	85	Negative		220	88	Negative
	5780	86	Negative		50842.9	88	Negative		64	86	Negative
	2119	85	Negative		61083.3	86	Negative		16	85	Negative
	1578	80	Negative		59905.6	85	Negative		136	80	Negative
	61.5	86	Negative		59329	80	Negative		16	86	Negative
	2.48	81	Negative		20160.5	86	Negative		8	81	Negative
	25200	80	Negative		2654.06	81	Negative		72	80	Negative
	58.4	87	Negative		61290.2	80	Positive		20	87	Negative
	1298	88	Negative		10478.4	87	Negative		40	88	Negative
	2600	86	Negative		58065.6	88	Positive		256	86	Negative
	1195	87	Negative		63017.2	86	Negative		108	87	Negative
	2251	87	Negative		62198.8	87	Negative		256	87	Negative
	1640	90	Negative		61487.9	87	Negative		52	90	Negative
	1654	81	Negative		58351.9	90	Negative		28	81	Negative
	224	83	Negative		60127.1	81	Negative		84	83	Negative
	39400	86	Positive		56704.1	83	Negative		208	86	Positive
	186	91	Negative		64367.7	86	Positive		80	91	Negative
	4520	87	Negative		15025.5	91	Negative		644	87	Negative
	841	87	Negative		36514.7	87	Negative		232	87	Negative
	349	86	Negative		54054.7	87	Positive		8	86	Negative
	1629	85	Negative		13713.2	86	Negative		88	85	Negative
	298	82	Negative		56756.5	85	Negative		12	82	Negative
	1931	83	Negative		19995.5	82	Negative		140	83	Negative
	527	81	Negative		58890.6	83	Negative		140	81	Negative
	67.5	86	Negative		29111.1	81	Negative		12	86	Negative
	748	80	Negative		15665.9	86	Negative		136	80	Negative
	1945	87	Negative		63332.8	80	Negative		68	87	Negative
	37.2	80	Negative		60370.1	87	Negative		12	80	Negative
		82	Negative		64229.5	75	Negative		68	82	Negative
	1349	89	Negative		5762.05	80	Negative		516	89	Negative
	184000	82	Positive		57183	76	Positive		960	82	Positive
	19000	82	Positive		54873.1	82	Negative		56	82	Positive
	4000	91	Negative		64410.9	78	Negative		1252	91	Negative
	2070	90	Negative		61094	66	Negative		48	90	Negative
	917	96	Negative		59570	89	Negative		24	96	Negative
	2476	93	Negative		68871.3	82	Positive		1344	93	Negative
	1413	90	Negative		69576.1	82	Positive		628	90	Negative
	481	82	Negative		65635.2	91	Negative		8	82	Negative
	170	81	Negative		64774.5	90	Negative		276	81	Negative
	1746	86	Negative		58256.4	96	Negative		8	86	Negative
	3370	88	Negative		62856.6	93	Negative		152	88	Negative
	875	83	Negative		64547.7	90	Negative		32	83	Negative
	583	81	Negative		57267.7	82	Negative		116	81	Negative
	448	88	Negative		59780.8	81	Negative		12	88	Negative
	2152	86	Negative		64008.3	86	Negative		36	86	Negative
	973	80	Negative		66295.6	88	Negative		128	80	Negative
	1231	81	Negative		63419.7	83	Negative		428	81	Negative
	180	80	Negative		41757.6	81	Negative		100	80	Negative
	18500	83	Positive		68155.9	57	Positive		100	83	Positive
					41604.6	88	Negative
					62504.3	86	Negative		9	86	Negative
					59336	80	Positive		32	80	Positive
					62837.7	81	Negative		107	81	Negative
					46911.4	80	Negative		25	80	Negative
					66705.5	83	Positive		25	83	Positive
					65120	78	Negative		105	78	Negative
