# Supplementary material for: mRNA vaccination in people over 80 years of age induces strong humoral immune responses against SARS-CoV-2 with cross neutralization of P.1 Brazilian variant
Source: eLife. 2021 Sep 29;10:e69375. doi: 10.7554/eLife.69375 (PMC8500710; doi:10.7554/eLife.69375)
Supplement: Figure 4—source data 1. [file elife-69375-fig4-data1.xlsx]

## Sheet: Sheet1
	4A				4B.1				4B.2
	ID	Victoria	Brazil		ID	Victoria	Brazil		Victoria	Brazil
	52	15895	640		52	15895	640		15895	640
	95	8359	200		95	8359	200		8359	200
	16	7808	474		16	7808	474		7808	474
	66	6308	180		66	6308	180		6308	180
	25	6304	640		25	6304	640		6304	640
	55	6091	313		55	6091	313		6091	313
	57	4286	640		57	4286	640		4423
	9	4163	210		9	4163	210		4286	640
	105	3571	557		105	3571	557		4163	210
	96	3540	130		96	3540	130		3571	557
	82	2714	199		82	2714	199		3540	130
	74	2442	57		74	2442	57		2714	199
	17	2369	159		17	2369	159		2442	57
	97	1660	139		97	1660	139		2369	159
	20	1559	176		20	1559	176		1660	139
	18	1044	267		18	1044	267		1559	176
	76	901	36		76	901	36		1353
	38	443	59		38	443	59		1044	267
	81	400	89		81	400	89		901	36
	65	147	46		65	147	46		791
									443	59
									400	89
									147	46
