# Supplementary material for: mRNA vaccination in people over 80 years of age induces strong humoral immune responses against SARS-CoV-2 with cross neutralization of P.1 Brazilian variant
Source: eLife journal article supplement (doi:10.7554/elife.69375), 2021-09-29
Supplement: supp [file elife_poa_e69375_Figure_1_figure_supplement_1.pdf › elife_poa_e69375_Figure_1_figure_supplement_1.pdf]

Figure 1- supplement figure 1

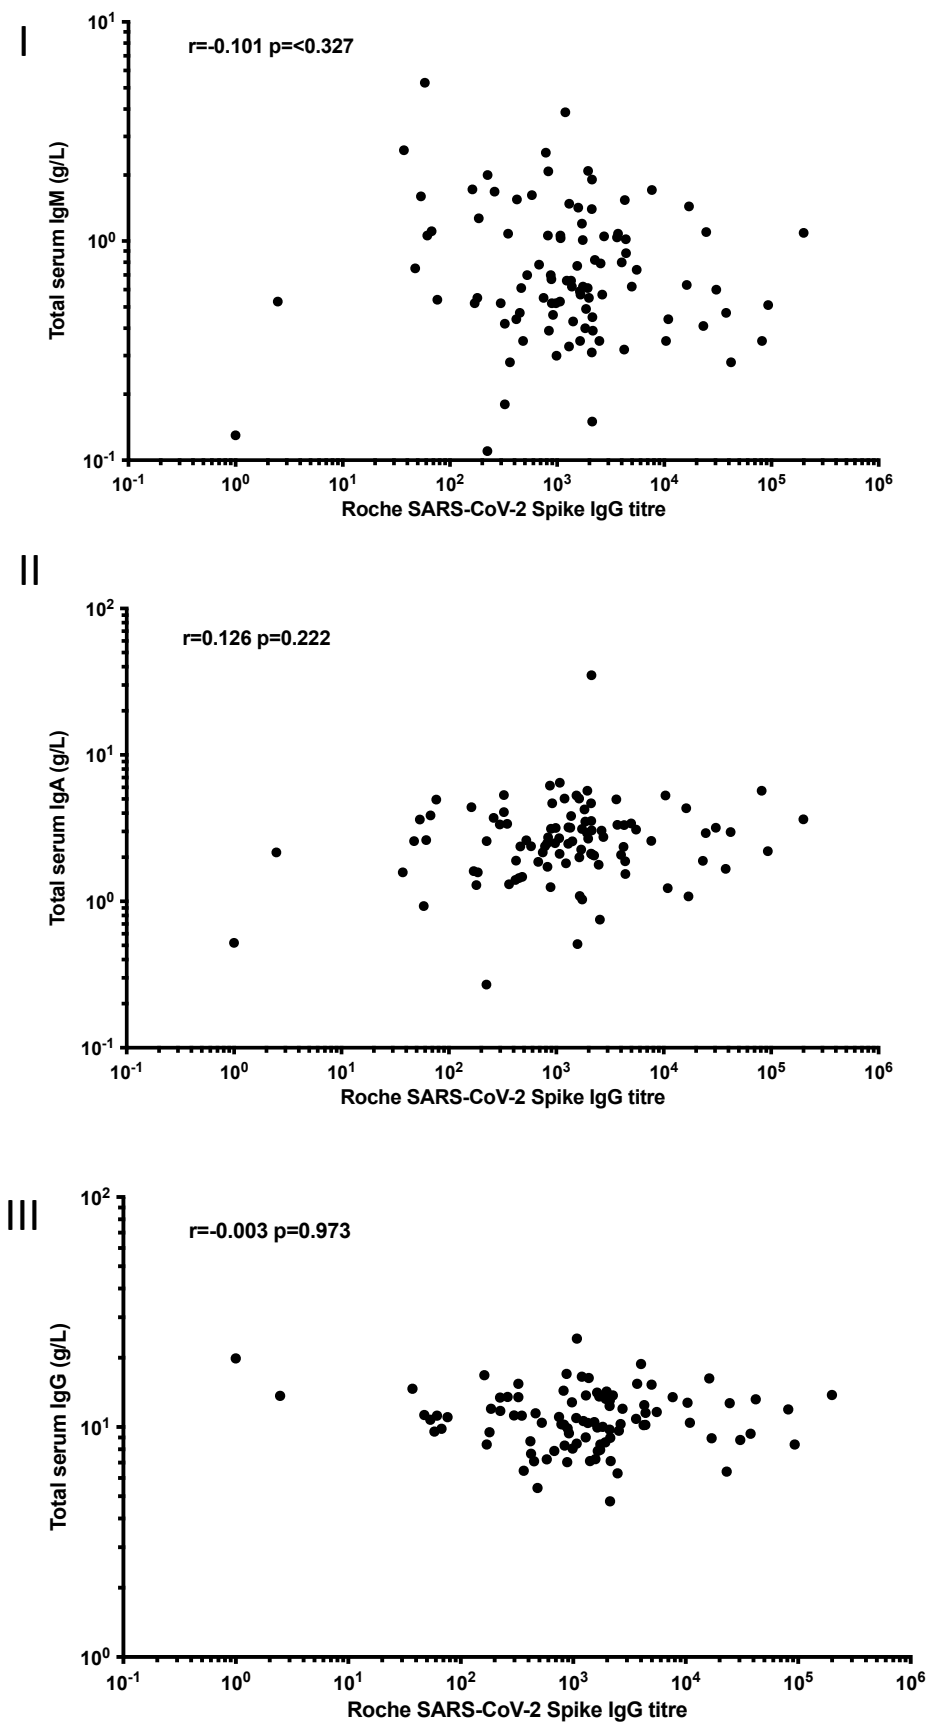

Total serum immunoglobulins were measured on participants and the relationship of SARS-CoV-2 antibody titre is shown against IgM (I), IgA (II) and IgG (III) (n=98).
